# Supplementary material for: Exploring the socio-emotional factors associated with subjective well-being in the unemployed
Source: PeerJ. 2016 Oct 6;4:e2506. doi: 10.7717/peerj.2506 (PMC5068347; doi:10.7717/peerj.2506)
Supplement: Supplemental Information 1 [file peerj-04-2506-s001.xlsx]

## Sheet: Hoja1
Age	Sex	Marital status	Time unemployment	Social support	Self-emotion appraisal	Other-emotion appraisal	Use of emotions	Regulation of emotions	Depression	Stress	Life satisfaction	Happiness
43	2	4		6.92	4.25	5.25	6	4.75	2.14	2.86	5	6.25
46	2	4	36	6.5	7	5.5	5.5	4	1.29	3	3.4	5.5
43	1	4	36	5.5	5	5	3.75	5.25	3.57	3.71	3.8	4.5
42	2	4	36	2	4.25	4	3.5	3.5	2.14	2.57	3	4.75
52	2	4		6.33	4.75	5.5	5.5	4.75	1.14	2	3.8	5.25
24	2	1	24	5.83	5	6.25	4.5	5.5	1.43	2.29	5.6	6.25
51	1	4	10	6.5	5	5	5.5	4	2	1.71	5	6
33	1	1		5.17	5	6.5	6.75	5.75	1.86	2.29	5	6.25
33	1	4		7	5.25	5	6	4.75	2.29	3.14	4.6	5
31	1	1	8	4.92	5.25	5	4	5.25	1	1.43	4.8	5.5
45	1	4	6	6.5	6.25	5.75	5.75	5.75	1.29	1.57	6	5
22	2	1		5.5	5.25	5.25	4.5	2.75	1.57	2.71	4.2	5
24	2	1	36	6.58	4.5	4.5	4	4	1.86	2.14	4.8	6.5
24	1	1	2	5.83	5.5	5	6.5	6	1.14	1.86	5.2	5.5
23	2	1	3	6.25	6.25	4.5	6.25	4.75	1.43	2.14	5.4	6.25
27	2	1	3	7	7	5.5	4.25	7	1	1	2.8	6
47	2	4	14	6.33	5	5.5	5.5	4.5	1.14	2	4.8	5
50	2	4		5.33	6.25	6.5	6.5	6.25	1.43	1.57	4	4
52	1	4	36	6.67	7	5.5	5.5	7	1.43	1.57	3.8	6
51	1	4	4	6.08	5	5	6.25	5.5	1	1	5.4	4.75
20	2	1		5.92	6.25	6	6	5.5	1	1.14	5.6
33	2	6	24	5.75	5	5.5	6	5.25	2.14	2.43	4.2	6
24	1	1	2	6.5	5.25	5.25	5.75	5.25	1.29	1.43	5.8	6.25
28	2	1	24	7	7	5.5	5.75	6	1.57	2.43	4.2	5.75
28	2	6		5.83	5	5.5	5.75	5	1.57	2.14	6.4	6
50	2	2	48	4.08	4.25	5.25	3.75	4	2.57	3	5.4	6
50	2	4	360	6.83	6.5	7	7	6.5	1	1	3.6	6.5
50	1	4	10	6	7	6	6	4.5	4	4	3.2	3.75
45	1	4	24	3.17	5.5	4.75	5.25	6.25	2	1.86	3	3
50	1	4	48	6	6.25	6	6.25	6.5	2	2	4.2	4
47	2	4		6.17	5.25	4.5	4.75	4.25	1	1	5.2	5
20	1	1	24	5.75	4.75	3.5	5.25	4.5	1	2	4.2	4.5
44	2	4	17	5.75	6.25	5.75	6.5	6	1	1.29	4.6	4.5
49	1	4	36	6.25	6.75	6	6.75	6	1	1.29	1.8	5
44	1	4	24	5.67	4.5	2.75	4.25	5.25	1.71	1.86	3.2	4.75
42	2	4	168	3.08	5.75	3.5	2.75	4.25	2.86	1.71	2.2	3.25
43	2	4	36	5.5	6.75	6.5	6.5	6.25	1.57	2.29	4.2	4.75
43	1	1	96	1.5	5.75	4	5.25	7	3	2.86	4.6	4.25
46	1	4	1	6.33	7	5	7	6.5	3.14	2.57	3.6	4.75
28	1	1	2	7	6.75	6.25	6.5	6.25	1.29	2.57	5.2	5.25
40	1	4	2	6	7	3.5	7	5.5	1.86	3.57	4.6	4.5
20	1	1	36	5.67	4	4.25	4.75	5.25	2.71	3	3.2	6.25
49	1	5		4	4.75	5	4.75	5	2.43	2.86	4.4	4.75
45	1	2	24	5.08	5	4.75	5	4.75	1.71	1.57	2.6	3.5
43	2	4	2	3.5	5.25	6.5	4.75	5.25	3.14	2.86	2	3
49	1	4	36	6	7	6.25	6.25	6.75	2.29	2.14	2.2	3.25
27	1	1	24	4.42	4.25	5	4.5	3.75	3.57	3.29	1.8	3.75
18	2	1	2	3.58	3	4.5	2.5	1.75	2.71	3.43	1.6	1.75
46	2	4	42	4.42	3.5	2.25	1.5	1	2.14	3.43	3.4	4
49	2	4	4	5.33	5.75	6.5	6	5.75	1.29	1.86	2.4	6.5
49	1	4	42	6.08	5	4.5	4.5	4.25	2.57	3	5.2	5.25
23	1	1	24	5.58	6	6.5	5.25	3.5	1.71	1.71	4	5
28	1	1	2	6.08	7	7	7	6.75	1.71	3	5	5.25
47	1	4	14	4.42	4.25	5	4.75	4.75	2.86	2.43	4.6	4.25
54	2	4	36	5	4.25	4.5	5.25	4.75	1.71	1.57	4.6	3.5
44	1	5	1	7	6.75	5	6	4.75	1.14	2.29	1.4	5.75
20	2	1	3	7	4.5	5.25	4	4.25	1.57	2.14	4.8	5.25
23	1	1		5.75	5.5	5.5	5.5	5.75	1.14	1.71	4.8	5.5
26	2	1		7	4.25	6	6.25	4.75	2.29	2.71	5	4.75
43	2	4	48	6.25	4.25	4.5	5.25	3.75	1.14	1.57	3	4.25
33	1	4		6.33	5.25	5	6.75	6	1.57	2.29	6.2	5
46	2	4	324	6.67	6	6.5	6.5	6.75	3.71	3.71	4	6.75
44	2	4		4.92	6.5	6.5	6.75	2	1.57	1.71	3	6.5
43	1	4		4.83	5.5	4.75	4.5	5	1.43	1.71	3.2	3.75
45	1	2		4	4.5	5.25	4.5	4.5	2.86	3.14		3.5
58	1	2		4.67	5.5	5.25	6.25	5.25	1.43	1.86	2.6	5.75
63	2	3		4.67	5.25	5.25	6	5.5	1.57	1.86	2.6	5.75
36	1	1	22	4.5	5.25	5	6.75	6.5	1.86	2	5.4	5
58	2	1	24	5.17	4.75	6.5	4.5	4.25	1.29	1.86	5.4	4.25
47	2	4	24	4.75	4.5	4.75	6.25	5.5	1.86	2.14	1	4
44	1	4	12	6.5	5.75	6.5	4.25	1.5	3	3.71	3.4	5
40	2	4		4.42	2.5	4	3.25	4.25	2.57	2.29	4.2	3.75
30	2	6	16	5.92	3.5	3	3	2	2.86	3.14	3.4	4
35	2	4	6	5.92	6	5.25	5.25	5	1.57	2	5.8	6.25
49	2	4	216	6	7	7	7	7	1	1.14	6.6	6
25	1	1	3	4.67	4	3.75	3.5	2.75	3	3.43	5	6.25
48	1	1	48	3.92	3.75	4.5	5.75	5	1.14	2	4	3.75
23	1	1		6.58	5.25	5.25	5.75	4	2.43	3.43	3.6	5.25
24	2	1	24	6.92	5.5	5.25	4.75	4	1.29	1.57	5	4.75
26	2	1	9	6.92	6.75	6.5	6.5	7	1	1	4.2	6
23	2	1	1	6.83	5.25	5.5	5.75	4	1.29	1.43	6	5.75
33	1	6	30	6.92	6.5	6.75	6.75	5.5	1.43	2.71	3.6	4.25
25	2	1	72	7	5	5.75	5	3.75	1.29	2.71	5.6	5.25
30	2	4	3	6.92	5	6	6	5.25	1.71	2.29	3.6	5.5
34	2	4	36	4.92	5.25	5	4.5	4.75	1.14	1.86	4.2	5.25
34	1	4		5.5	4.25	4.5	4	4	1.29	1.14	4	5.5
51	2	4		4.92	5	4.75	5.5	5	1.43	1.71	3.4	6
47	2	4		4.42	5.25	4.25	5	5.5	2.43	2.14	2.6	4.5
57	2	4	36	6.08	4.75	5	4.5	4.5	2.43	2.86	4.4	4.5
39	2	1		6.67	1	1	1	1	1.71	2.29	1.4	4.75
40	2	4	60	6.83	6.5	6.25	6	6	1	1.29	5.8	6.75
25	1	1	6	6.42	3.25	3	3.75	2.5	1.71	1.43	2.2	4.25
37	1	4	18		4	4.25	4.25	4.5	3.29	3.43	3.4	4
46	2	2	36	5.92	4.5	4.5	5	4.5	2.43	3.14	1.6	4.5
47	2	4	48	7	5.5	6	5.25	5.25	1.86	2.57	4.4	4.5
29	1	1	4	6.42	6.25	6.75	6	5.5	1	1	4.2	6.25
32	1	4	9	7	4	5.75	5.5	6.25	1.71	2	5.6	5
31	1	1	24	6.5	6.5	5.5	7	6.5	2	2	4	5.25
46	2	1	1	7	4.25	5.75	4.75	4.75	2.43	2.57	3.2	4
34	2	4	48	3.75	6.25	6.75	6	2.5	1.71	1.71	2.4	7
24	2	1	3	6.58	3.75	5.75	4.5	4.25	2	2.57	4.2	4.75
38	1	4	30	2.83	6	7	6.5	2.5	2.43	3.57	3.2	2.25
44	1	4	4	5.75	6.25	6.25	6.5	6.75	1.14	1.86	5	5.5
22	2	1	24	6.67	6.5	7	4.5	6	1.57	1.71	5.4	5.75
24	2	1	36	5.83	4.5	4.5	4.5	4.5	2.29	1.86	4.8	5.5
38	2	4	36	5	5.5	5.25	5.25	5.75	1.14	2.14	3.6	5
22	2	1	24	6.17	5.75	5.5	6.5	5.5	1.29	1.71	5.2	5.75
36	1	5	24	6.17	7	6.25	6.25	4	1.29	2.71	5.4	7
23	2	1	24	6.92	5.75	6.25	5.75	5.25	1.71	2.14	5.4	4.75
50	2	4		6.25	4	5	4.25	3	1.14	1.86	4.8	5
49	1	4	3	5.25	6.25	6.25	5	3.25	3.86	3.86	1.2	3.75
34	2	6	3	6.42	5	5.5	5.75	4	2.43	2.57	2.6	6.25
29	1	6	60	6.17	4.75	6.75	5.5	5.5	3.71	3.57	2.2	4.25
27	2	1	3	6.75	4	5	5.5	2.5	2.14	3	2.8	4.75
26	1	4	9	7	7	7	7	7	1	1.29	6.4	7
40	1	4	7	7	4.75	5.5	5.5	5.5	1.29	1.57	4.4	6.5
28	1	1	12	6	4.25	5.5	5.25	5	1.57	2.29	3	4.5
26	2	1	3	6.67	6.25	5.75	6.25	5.75	1.43	2.14	6.2	5.5
48	2	5	48	5.42	7	7	7	7	1.43	1.86	5.4	7
34	2	1	12	5.67	5.25	4.25	5.75	5.75	1.29	1.57	3.8	6.5
53	1	4	12	5.92	5.25	4.25	3.75	3.25	2.86	2.14	5.6	4.75
58	1	4	36	6	6.25	6	6.25	6	1	1	4.6	6.25
58	1	5	48	3	4.5	3.75	4.75	5	1.43	2.14	3.2	5
45	1	5	18	7	7	3.25	5	5	1.57	2.43	3.2	5.5
22	1	1	1	6.33	5.75	5.75	5	4	1.29	1.86	5.6	6.5
40	1	1	24	3.75	6.5	7	2.5	2.5	3.86	3.86	3	2.75
29	2	1	24	4.42	6	5.75	4.25	6.5	3.71	3	3	3.5
46	1	4	48	5.92	7	5.5	6.25	6	1	1.14	4.2	6.25
30	2	6	1	6.83	3	3.25	3	2	1.29	1.29	5.8	5.5
24	1	1	24	5.58	6	5.5	5	5.5	1.43	2.14	4	4.75
27	2	1	4	6.33	5.75	5.5	3.25	4.75	2.29	2.86	6.2	4.25
27	2	1	24	6.42	5.75	6	3.5	4	2.29	2.43	3.6	4
27	1	2	36	1.67	2	5.5	3	1.5	2.29	2.43	2	2
38	1	4	36	4.67	3.25	2	2.5	3.75	2.14	1.43	3.6	2.5
20	1	1	24	4.58	3.5	4.5	3	4.25	1	1.29	4	4.25
21	1	1	36	5	4.5	4.75	4.75	4	0.14	0.71	4.6	5
44	1	4	8	5	4.25	4.25	5.5	4.75	1.86	2	5	4
25	1	1	12	5.42	4.5	4.75	5.5	6	1	1.29	5	5.5
26	1	1	12	4.5	5	3.25	3.25	4.5	2	1.71	3.2	3.5
18	1	1	8	5.67	4.25	4.75	5.25	5.75	1.14	1.14	4.8	4.75
48	2	4	60	3.17	2.5	1.25	2.75	1.5	2.43	2.14	2.6	3.5
45	2	5	24	5.17	5.75	5.75	4.75	5	0.86	0.86	4.4	4.25
25	2	1	24	4.33	2.75	2.75	2.75	3.25	1.86	2.14	2.2	3.25
22	1	1	48	4.58	3.5	4.25	4.5	4.25	0.71	0.71	3.6	5.5
20	2	1	24	7	5.75	6.5	5.5	4.75	0	0.29	5.8	6.75
27	1	1	36	3.17	5.25	5.5	3.25	3.75	0.14	1	3.6	4.5
25	1	1	48	4.92	5.25	5	4.25	4	0	0.71	3.4	4.5
27	2	1	18	4	5	4.25	3.5	4	1	1.57	4	4
35	2	2	2	4.42	3	3.75	2.75	3.25	1.86	1.57	5.4	5.5
20	1	1	8	6.25	5.5	5.25	5	4.75	1.29	1.71	5.2	5.25
23	2	1	14	6.67	5.5	6.5	5.25	3.75	0.29	2	4.2	5
28	1	1	36	6.17	6	6	5.75	6.75	0.14	1	5.2	6
22	2	1	24	5.75	5.75	4.75	4.25	5.5	2.71	2.57	3.4	4.25
24	2	1	24	5.08	4.25	4	4.75	3.25	1.43	1.86	3.8	3.75
31	2	2	24	6.75	5.75	5.25	6	6	0.14	0.57	4.6	6.25
25	1	1	48	4.42	3	4.5	3.25	3.25	0.71	1.86	3.8	4.5
28	1	4	3	5.75	3.75	3	2.75	2.75	2.43	2	2.2	4
34	2	4	24	1	6.5	6	6	5.75	0.86	0.71	4	5.75
47	2	2	12	3.83	4.75	4.75	5.25	4.5	1	1.14	5.4	5
49	1	5	1	5.17	3.5	3.25	5.25	3.25	1.57	1.86	4	4.5
29	2	1	2	3.92	5.5	4.5	6.25	4.75	0.57	0.29	6.6	5
25	1	1	8	5.33	4.5	4.25	3.75	4.75	2	2.14	3.8	3.25
25	2	1	12	6.25	4.5	6	4.75	4	0.14	1	4.4	3.75
47	1	4	18	4.75	4.5	4	5.25	3.75	2.86	3.57	4.6	5.25
22	2	1	3	6.33	6.25	6.75	6.25	5.25	0	0.29	6.2	6.5
33	1	4	4	3	3.75	3	3.75	3.75	1.57	1.86	3.2	1.75
47	1	3	84	5.67	5.25	5.5	5.25	5.75	0	0.57	5	4.75
37	2	5	56	4.5	5.5	5.25	4.25	3	3	2.86	2.6	3.75
52	2	4	36	5	6.25	6.5	5.5	5.75	0	0.86	6	5
27	1	1	12	6	6	6	6	6	0.43	0.43	6	6
39	2	4	8	5.08	2.5	3	4.5	3.25	1.29	2.29	4.8	5.25
22	2	1	12	6.42	5	6	4.25	5	1.43	1.43	4.4	4.75
29	2	4	10	7	5.5	5	5.25	3.25	0.29	1.14	5.4	7
26	1	1	18	4.67	5.25	4	5	5.75	0.14	0.29	4	4.75
23	1	1	16	6.75	4.5	4.5	4.75	4.75	0.71	1	4.8	5.5
29	1	6	24	4.17	6.75	6.25	6.75	5.75	0	0.29	4.4	4.25
56	2	4	24	7	5.5	5.75	5.25	5.5	0.71	2	6.4	5
25	1	1	15	6.58	6.5	7	5.75	5.25	0.57	0.57	5.4	4.5
23	1	1	5	5	6.5	6.25	6.5	5.5	1.71	2.43	4.2	5.75
30	1	6	12	5.83	5.5	3.25	5.75	6	0.43	1.14	5.2	4
21	1	1	9	6.25	5.75	6	6	6	1	0.57	5.6	5.75
26	2	1	9	6.33	4.25	6.25	5.75	4.5	0.29	1.57	4.8	4.75
22	2	1	3	4.5	4.5	5.25	4.25	3.75	0.86	1	3.2	4
33	2	1	12	5.75	5.5	7	6.5	2.75	1.86	1.86	5.2	5
22	2	1	6	6.5	6	5.5	6.25	6	0.29	0.71	5.8	4.75
30	1	4	2	4.67	6	4.25	6.25	3.75	1.43	2.43	3	4.75
20	2	1	4	7	5.5	5.75	6.5	3	0	0.71	7	5.5
23	1	1	12	6.92	6.25	5.5	6	5.25	0.14	0.71	5.4	5.75
36	2	4	6	7	6.75	5.75	6.5	6.25	0.14	0.71	6.6	6.5
23	2	1	84	6.08	6	6	6	6	0.71	0.86	6	6.5
22	1	1	14	6.75	5.25	4.5	5	5.25	2.14	2.86	3.2	3.25
53	1	4	24	3.17	6.25	6.25	6.75	6.5	0.71	1.14	4.6	5.25
25	1	1	8	6.33	5	7	6.75	4.25	0.86	2.71	6	4.75
27	2	1	12	7	4.75	5.25	5.75	4.25	0.86	2.29	4	4.5
23	2	1	12	5.58	5.25	5.75	6	4	0.43	1.71	5.4	5.5
26	1	1	12	5.17	4	4.25	4.5	5.25	0.43	0.86	3.2	4.25
45	1	4	12	4.08	5.5	5	5.5	6	0.57	1.57	4.2	5.25
52	1	4	24	7	6.75	4.5	7	7	0	0	4.6	5.75
25	2	1	8	6.08	3.5	5.75	6	2.25	1.57	2.43	2.8	5
22	1	1	5	5.42	5.75	4.75	6	5.25	0.57	1.14	4.8	6.25
29	2	1	2	6	5.5	6	5	5.75	0.14	0.43	2.4	5.75
24	1	1	8	6.67	5	6.5	5.25	6	1	1.71	5.2	4.5
23	2	1	9	6.08	5	6	6.25	4.75	0.29	0.86	5.8	5
24	1	1	12	4.42	6	6	5.25	6.5	1.14	1.57	4	4.25
22	1	1	6	4.08	4.5	4.75	6.25	5.75	1	0.86	5.4	6
25	1	1	36	4.83	5	5.75	5	5.75	0.86	0.29	4.4	3.5
24	1	1	15	6.08	7	6.5	5	4.25	0.14	0.86	4.6	5.75
25	1	1	60	5.25	6.25	5.75	5.75	7	0	2.14	2.4	3.5
24	1	1	19	6.42	5.25	5.5	3.75	6.75	1.43	1.43	5.2	5.25
24	1	1	24	7	7	7	7	7	0.14	0.71	4.2	5.25
24	1	1	60	5.67	7	6.25	6.25	6.25	0	0.71	6	5.75
23	2	1	24	6.17	5.5	5.5	5	4	0.14	0.29	5	5.75
23	2	1	6	6.25	6	5.5	5.75	5.5	2.14	1.43	3.6	4.5
22	2	1	5	4.75	5.5	5.25	4	5	0.29	0.71	3.8	4
22	2	1	5	6.25	6	6.75	5.25	5	0.14	1	5.4	5.5
22	2	1	6	6.67	6.25	6	6.5	6.25	0	0.43	6.2	5.75
21	1	1	12	5.25	7	6.5	5.25	7	0.29	0.57	5	6.75
23	2	1	18	6.08	5.75	6	6.25	6.25	1.29	1.71	4	4
20	2	1	1	6.75	5.25	6.75	5.25	4.25	0.57	1.43	5.6	5
30	2	1	24	6.17	5.5	5.5	5.25	4.25	0.57	1.14	4	4.5
23	1	1	60	7	7	6.75	6.25	6	0.57	1.29	5.6	5.75
24	1	1	24	5.25	6	5.75	6	5.5	0.14	0.86	5.8	5.5
24	2	1	1	6.17	6	5.75	5.75	5.5	0.14	1.14	4.8	5.75
22	1	1	36	6.42	4.75	5.75	5.5	4.5	0.57	1	6	5
28	2	1	24	6	3.75	4.75	5.25	4	0.14	0.86	3.4	5.5
23	2	1	10	6.33	6	5	5.5	3.5	0.14	1	4.8	5.5
30	1	4	6	6.83	6.25	5.75	6.75	6.5	0	0.14	5.6	4.5
55	2	4	7	5.5	6	5	5.5	3	0.86	1.57	5.4	5.5
28	2	1	9	6.25	6.5	6.75	6	5.5	0.43	1.43	5	5.5
27	1	1	24	5.92	5.75	4.5	6.25	5.75	0.57	1.43	5.8	5.75
22	2	1	11	6.75	7	6.5	5.5	5.75	0.43	1.57	5.6	6.25
33	1	1	4	5.75	5	4	5.75	6	0.29	1.29	4.4	6
25	2	1	12	5.67	5.25	5.5	5.25	5.5	0.14	1	4.6	5.75
23	2	1	12	6.58	5.5	6	5	2.75	0.71	1.29	5	4
25	2	1	12	6.42	5.5	5.5	5	5	0.57	0.71	3.8	5.5
30	2	6	14	6.58	5.75	4.5	7	5.75	0.71	1.57	6.2	5.25
22	2	1	24	7	5.5	4.5	5.5	4.5	0.14	1.14	5.8	5
24	2	1	12	6.83	5.75	5.75	4.5	4.5	0.43	1.29	3.8	5.5
26	2	1	36	6.92	5.75	5.75	5.25	5.5	0.43	0.71	4.2	5.5
32	1	1	24	6.67	6.75	6.75	7	6.5	0.43	0.57	5.2	4.5
26	2	1	12	6.5	6.5	5.5	5.75	5.5	0.14	0.57	6.4	5.25
24	1	1	72	6.92	5.75	5.5	4.5	3.5	0.14	0.71	4	4.75
25	2	1	1	6.33	7	6.5	6.5	6.25	0	0.29	7	7
27	2	1	6	6.75	5.75	5.75	5.75	4.5	2.57	2.43	5	4.75
27	2	1		6.33	4.5	5.5	5.5	4.75	0.43	1.71	3.2	5.75
25	2	1		7	7	6.25	7	5.25	0	0.43	6.4	7
24	1	1	8	6.33	4.25	5.25	5.25	3.25	0.43	0.43	4.8	5
27	1	1	8	7	5.5	5.5	6.5	6.25	0.43	1.29	5.6	4.5
24	1	6	24	4.75	3	4.5	2.75	3	1.57	1.43	1.6	3.25
22	1	1	9	5.92	6	5	5.75	3.25	1	1.14	4.4	4.25
49	1	1	24	6.17	5.75	6.25	6.5	5.5	1	2	4.8	4.25
29	1	1	8	3.5	5.75	5.25	7	5	0.71	1	3.8	5
25	1	1	8	5.17	5	4	6	5	0.57	1.43	4.2	4.25
25	1	1	36	6	5.25	4.75	4.75	4.75	0	0.43	5.2	5
25	1	1	9	2.92	4.25	4.75	4.75	4.75	1.14	1.86	1	2.5
33	1	1	4	6.67	5.75	5	5.75	5.5	0.14	0.29	5.2	6.5
23	1	1	0	6	5.25	5.75	4.75	7	0.29	1	5.6	5.5
33	1	1	4	5.5	5	4	4.75	4	0.86	1	3.2	4
24	1	1	5	6.17	5	5.5	6	5.25	0.43	0.57	5	5.75
24	1	1	7	6.58	4.75	5.5	5.25	5.5	0	0.57	5	5
28	1	1	16	6.92	5	3.75	4.5	5	0	0.14	5	5.5
24	1	6	2	5.25	4.25	4.25	4.5	3.75	0.86	0.43	3.8	4
35	1	1	4	6.25	4.5	5.75	5.75	3.25	0.14	1.43	4.4	5.75
26	1	1	9	6.67	5.5	5.25	4.25	3.75	2.14	2.29	5.6	4.75
29	1	1	24	3.17	6.5	6.25	6	2.5	0.43	0.57	6	4.5
24	1	1	8	6.5	5.75	5.25	5.25	5.5	0.43	0.86	5.8	5.5
21	1	1	8	5.5	5.5	5.25	5.25	4.5	0.43	0.71	4.8	6.25
52	1	1	4	6.67	6.75	6.25	6.75	6.25	0	0.14	4	6.25
30	1	3	3	5.67	5	4.75	5	4.75	0.14	0.43	6.2	6.5
20	1	1	3	5.75	4.5	5.25	5.5	3	0.71	1	4.4	4
25	1	2	7	6	3	3.5	5.75	5.5	0.57	1.29	4.2	5.25
35	1	1	24	6	6.25	6.25	6.75	6.25	0.43	0.29	2	6.5
30	1	1	9	6.83	5	5.25	4.5	3.75	0.29	0.43	5.4	5
52	1	2	8	5.33	6.25	6.5	6.25	6.5	0.14	0.29	5.6	5
21	1	1	12	5.92	5.5	6.25	5.5	6.5	1.14	0.29	5.2	5
28	1	1	4	6.17	5	5.25	5.5	6.25	2.29	2.43	5	5
21	1	1	6	4.83	2.25	4	4	2.5	0.86	1.57	2.4	5
45	1	2	8	5.42	5.25	5.25	4.5	5.25	1	0.86	2.8	4.75
43	1	5	17	4.5	4	4	4	4	0.14	0.14	4	4
36	1	2	24	7	7	7	6.75	5.75	0.29	0.57	6.2	5.25
27	1	5	1	6.17	7	4.5	6.5	3.5	0.14	0.29	6	5.5
22	1	1	6	5.92	4	5.25	5.5	5.5	0.29	0.29	4.6	4
23	1	1	6	6.58	5.5	5.5	5.75	6	0.29	1	5.2	5.25
38	1	1	30	5.58	5.75	5.75	6.5	6	1.86	2	3.4	4
34	1	2	24	6.42	6	5.25	5.75	6	0.86	1.43	4.6	5.75
30	1	1	7	2.67	5	5.75	5	4.75	0.29	0.71	3.4	4.5
42	1	2	8	6.33	5	4.5	5	5	1.57	1.29	4.2	4
35	1	1	2	6.33	5.25	5.25	5.75	6	0	0.14	4.4	5.25
39	1	2	36	5.92	6	5.25	5.5	4.75	0.29	1	3.8	4.25
30	1	2	27	5.5	5.5	5.25	3.75	4	0.14	0	4.4	5.25
51	1	2	2	6.08	5.5	5.75	5.75	6	0.43	0.29	5	4
39	1	1	21	5.5	6.25	5	6	7	0	0	5.6	6
40	1	1	2	6.25	5.75	5.5	5.75	6	0.57	0.71	6.6	4
29	1	1	12	3.67	6	4.75	5.5	5.75	0	0.29	3.4	3.75
32	1	1	16	5.25	7	5	6.25	6.5	0.86	0.43	1.6	2.5
36	1	2	12	5.42	4.75	3.25	4.5	4.5	1.14	0.71	4.8	4.5
30	1	1	8	4.17	6	5.25	6	5.5	1.71	1.71	5.6	5.75
22	1	1	18	5.92	4.5	5.5	4.25	4	1.43	0.86	4.6	4.5
28	1	1	24	6.67	3.75	4.5	5.5	2.75	1.43	1.86	4.4	7
29	1	6	12	6	5	5	5.5	4.75	1	1.43	3.8	4.75
42	1	2	63	7	5.75	6.5	6.5	6.75	0.57	0.57	5	5.5
22	1	1	8	6.33	7	6.25	6.5	6.75	0	0.14	4.4	5.25
22	1	1	9	5.67	4.5	4.25	6	4	1.14	1.71	4.4	3.75
22	1	1	9	4.92	4.75	5	4.25	3.5	1	1	3	4.25
24	1	1	5	6.42	7	6	6.25	5.75	0.14	0.29	4	6
19	1	1	5	6.75	5	5	5.25	5.25	0.29	0.57	4.4	4.75
27	1	1	12	6.08	5	6	4.75	5.25	1.57	1.86	3	3.75
30	1	1	8	6.75	6.75	6.25	6.5	6.75	0	0	5.8	6.5
45	1	2	63	6.08	5.75	5.75	6.25	6.25	0.29	1.14	5.2	6
31	1	6	24	6.17					0.86	1.29	5.6	5.25
27	1	1	12	5.42	5.75	5.75	5	5.25	0.29	0.86	2.8	4.25
28	1	1	15	5.5	4	4.5	3.75	4.25	1.86	2.14	2.6	3.5
28	1	6	12	6.58	6	6.5	6.5	6.25	0	0.14	3.2	6
24	1	1	20	5.5	5.75	4.75	5.5	5	0.29	0.57	4.8	5.75
37	1	2	10	6.5	5.5	4.5	5.5	5.5	0.43	1	4.8	4.75
34	1	1	24	5	4.25	6.25	3.75	4.25	2	1.29	3.2	3.25
31	1	1	13	6.42	5.25	5.75	5.75	5.5	0	0.86	4.6	5.25
50	1	1	16	5.5	5.75	5.75	5.75	5	0	0.57	5	4
39	1	1	15	2.92	5.25	4.75	5	5	1.43	0.71	4.2	4.5
31	1	1	16	5.08	5.5	6.25	5.25	5.25	1.71	2	2.6	3.25
30	1	1	24	6.08	4	3.75	5	4.75	0	0.57	5.4	5
33	1	2	36	2.58	5.75	5.5	7	6.25	1.14	1.29	3.6	5
31	1	1	36	6.5	5.5	5.25	6	5	1.71	2.29	2.2	3.25
42	1	1	6	5.75	5.75	6.25	6	6.5	1.43	1.14	5.6	4.5
29	1	1	36	3.42	3	4.75	4.25	5.25	1.86	1	4.4	4
35	1	1	24	6	6.25	6.25	6.75	6.25	0.43	0.29	2	6.5
30	1	1	9	6.83	5	5.25	4.5	3.75	0.29	0.43	5.4	5
25	1	1	23	4.75	3	4.75	3.25	2.25	1.57	2.14	2.8	3.75
43	1	2	168	3.25	4	4.5	5.5	3.75	0.86	0.86	3.8	4
24	1	1	10	6.58	6.5	4.75	5.5	5	0.14	0.71	5.8	5.25
40	1	6	11	5.83	4.75	4.75	6	5.25	0.71	1	3.6	3.5
26	1	1	9	5.42	4.5	5.25	4.75	4.5	0.71	0.43	4	4.75
36	1	2	12	6.5	6.5	6	7	6.25	0	0	6.8	5.5
40	1	1	8	4.33	5.25	5	4.75	3.75	1	0.29	4.4	4
44	1	5	36	6	5	4.75	5	5	0.43	0.86	5.2	6.5
34	1	2	12	4.67	5.5	5.25	4.5	6	1.43	1.14	2.6	7
22	1	1	12	4.83	4.75	4.5	5	4.75	0.14	0.43	4.2	4.75
34	1	1	9	5.75	4.75	5.25	5	5.25	1.86	1	5.4	6.75
25	1	2	9	5.92	5.25	6	5.75	5.75	0.57	0.29	6.6	5.25
31	1	1	10	6.17	7	6.25	6.5	6.75	0.14	0	1.4	4
28	1	6	11	6.33	6.25	5.25	6.5	6.25	0.14	0.14	5.4	5
34	1	1	10	6.42	6.25	6.75	7	6.5	0.57	0.71	6.2	6
25	1	1	18	6.58	5.25	5.5	4.75	4.75	0	0	5.4	5.25
55	1	2	33	5.17	7	7	6.25	7	0.29	1	4.8	7
29	1	1	4	5.92	5.75	5.75	5.75	6.5	1	2.14	4.6	4.75
24	1	1	12	6.33	5.75	5	6	3.75	1	2.71	3.6	5.25
20	1	1	3	6.58	5.75	4.5	6	6	0.57	0.29	4.6	6.25
20	1	1	2	5.92	5.5	4.75	5	4.25	0.57	1.57	6	5.5
23	1	1	10	7	7	6	7	7	0	0.57	6	7
27	1	1	10	4	4.75	5.25	3.75	4	0.43	0.57	2.4	4.75
23	1	1	2	6.58	5.75	5.25	6	5	0.14	0.71	4.4	4.5
21	1	1	9	2.5	6	5.25	5.5	5.5	0.43	0.43	4	3.75
26	1	1	5	6.5	6	5.25	6.75	5.75	2.57	2.57	7	5.25
23	2	1	10	6.42	6.75	7	6.25	7	0.43	0	3.2	5.25
24	2	1	24	6.08	3	2.75	2.75	2.75	1.57	2.14	4.2	5
23	2	1	25	5.67	4.75	5.25	3.75	4	1.43	1.86	3.4	4
36	2	2	3	5.92	4.5	5.25	5.5	4.25	1.14	1.71	4.2	4.5
33	2	1	8	4.42	4.75	5.5	4	3.5	1.29	0.71	2.2	2.5
29	2	6	24	4.92	4.75	5.75	5	4.75	0.29	0.86	6	5.25
21	2	1	6	6.75	6.25	6.5	3.75	5	0.71	1.29	4.4	5.5
27	2	1	7	4.92	5.75	5.75	3.75	2.75	1.29	1.57	3	2.5
25	2	1	6	6.42	6	5.75	5.5	4.75	0.14	1.29	3.4	5.25
23	2	1	12	5.08	5.25	5.5	6	4.5	0	0.14	6	5.25
24	2	1	8	4.75	3.25	4	3.25	3	0.57	0.14	3.6	4.5
29	2	1	17	6.17	5.25	5	2	3.75	2.43	0.71	2.8	4.25
27	2	1	8	6.33	6.75	6	6.25	6	0	0.71	5.2	5.25
39	2	5	36	4.58	5.75	5.5	5	5.5	0	0.14	4.6	5.25
34	2	1	11	4.25	5.5	5.25	4	3.5	0	0.43	4.2	6
34	2	2	9	5.5	5.25	6	5	5.5	0.57	0.57	6	4.25
20	2	1	12	6.17	6.75	6	6.25	4.25	2.14	1.71	5.6	3.5
24	2	2	3	6.42	5	6.25	4.5	4.25	1.71	1.57	4.8	3.75
23	2	1	10	4.83	4	6.75	6.5	2	1.86	2.57	3.8	3.25
38	2	2	6	6.42	6	6.25	6.25	5.5	0.14	1	4.4	4.25
45	2	2	24	5.25	7	7	5.75	6	0	1	5.4	5.25
33	2	5	24	5	5.5	5.75	5.25	5.25	0		4.8	7
27	2	1	10	6.08	5	5.25	4.5	4.5	2	2.14	3.8	4.5
29	2	1	38	7	4.25	5.75	4.25	3.75	1.86	1.71	2.4	3.25
35	2	2	7	4.92	4.5	5.25	5	5.25	1.14	1.29	4.4	4.5
53	2	2	4	5.08	6	5.75	5	5.5	1.43	1.71	3.2	4.25
40	2	4	11	3.83	5	5.25	4.5	5.5	3	2.43	2	4.25
26	2	1	12	6.75	5	4.5	4.25	5	0	0.14	4.8	5.5
29	2	1	11	6.17	5.5	5	5.75	5.75	0.14	0.71	3.8	4.5
34	2	2	36	7	5.5	5.75	4.5	6	0.14	0.71	5.6	5.75
38	2	1	10	5.08	5	5	4.25	4.25	1.43	1.29	4.8	5
29	2	5	15	4.75	5.75	7	4.75	7	1.29	0.43	2.8	5.5
40	2	2	40	6.17	5	6	6.5	5.25	0.57	1.43	4.6	5.75
36	2	2	48	4.75	4.75	5.75	5	4.5	0.71	1.86	5	4.75
44	2	2	6	6.67	5.5	4.75	5.25	5.5	1.14	1.14	4.2	5.5
42	2	2	27	6	5.75	5	4.75	6	0.29	0.43	4.2	5.5
23	2	1	8	7	6.75	6.5	6.25	6.5	0.29	0.86	5.8	5
21	2	1	0	6.08	5	6.25	2	3	0.86	1.29	4.6	5
26	2	1	8	5.5	5.25	5	5.25	5.25	0.14	0.57	4.6	4.25
28	2	2	24	6	6	6.25	5.75	6.25	0.29	1.29	5.4	4.5
21	2	1	8	6	6.75	6.5	6.5	6	0	0.43	5	6.75
27	2	1	24	6.58	5.75	5.25	5.25	5.75	0.14	0.57	4.2	6.5
24	2	1	36	6.92	6	7	5.5	5	2.71	2.29	4.2	6.5
37	2	5	20	6.42	5.5	6	5	4.5	0.57	0.86	4.2	4.25
34	2	2	28	6.33	5	5.75	4.25	5.5	1.14	1.57	4	3.25
46	2	1	8	5.33	5.75	3.75	4	5.5	1.57	1.57	5	5.5
30	2	1	5	5.25	5.75	6	6.75	5.25	0.71	0.86	6	4.75
21	2	1	8	5.92	5.75	5.75	5.5	4.75	0	0.57	3.6	5.75
45	2	1	12	7	5.5	5.75	4.75	5	0.43	0.71	5	5
38	2	2	24	6.58	5.5	6	4.75	4.75	0.14	0.57	2.8	3.75
37	2	2	20	7	6	6	6	5.25	0.14	0.43	3.4	4.25
38	2	1	6	6.75	2	6.5	2.5	2	2.29	2.29	3.4	3.75
30	2	1	2	6.5	5	5	5.5	3.5	0	1.43	5.2	5.5
25	2	1	2	6.08	5	4.75	5.25	4.5	0.57	0.71	5.2	5
35	2	2	7	4.92	4.5	5.25	5	5.25	1.14	1.29	4.4	4.5
30	2	1	7	6.67	7	5.5	7	5	0.29	1.86	4.6	5.25
24	2	1	6	3.5	3.5	4	3	3.25	0.43	0.71	2.6	4.25
33	2	2	30	6.25	6	6.25	6	6	1.14	0.86	4	7
43	2	2	8	6.75	5.5	6	5.25	5	0	0.29	6.2	5
26	2	1	12	4.25	6	6.5	6.75	6.5	0.43	0.29	5.2	4.5
27	2	1	10	6.08	5	5.25	4.5	4.5	2	2.14	3.8	4.5
29	2	1	38	7	4.75	5.75	4.25	3.75	1.86	1.71	2.4	3.25
48	2	1	10	6.17	6.5	6.25	6.75	6	0	0.14	6.2	5.5
30	2	2	8	6.92	7	6.75	7	7	0.29	0.14	6.8	6
32	2	2	24	6	5.5	5.75	5.75	5	0.29	0.86	3.8	4.5
23	2	1	10	7	6.25	7	6.75	5.5	0	0.29	6	6.25
33	2	1	10	5.25	4.25	3.5	4.25	4.75	2.43	2	1.8	2.5
43	2	5	36	4.75	4.25	4	4.25	4.25	0.29	0.29	5	5
29	2	1	1	4.42	4.75	4.5	4.75	4.5	0.14	0.14	1.4	3.25
35	2	2	1	5.75	5.25	4.5	4.5	4.25	2.57	2.29	4	4.5
32	2	6	10	7	6.75	6.75	5.25	5.5	0.14	0.57	4.6	5.75
34	2	2	24	4.25	6	6	6.75	5.75	1.86	1.71	3.2	7
27	2	1	9	5.33	6.5	6.5	5.75	5.25	0.29	0.43	3.2	5
33	2	2	35	6.5	6.5	5.5	5.75	6.5	0.57	1.71	6	4.75
25	2	2	48	6.33	5.25	4.5	5.75	4.75	0.14	0.29	5	5.5
26	2	1	12	6.25	5	5	2	5.25	0.86	1.14	2.4	5.25
24	2	2	1	5.17	4	4.5	4	4.25	0.71	0.71	3.8	5.75
25	2	1	10	6.25	3.75	3.25	3.75	5.25	0.86	1.14	2.6	3.75
36	2	2	12	7	6	5	5.75	5.75	2.14	1.86	4.2	6
18	2	1	6	7	6	6	6	6	0	1	6.4	5
32	2	1	19	6	6.25	6.5	5.75	6	0.86	1.86	3	5
32	2	1	14	6.75	5.5	6.25	5.25	5.25	1	0.57	5.6	5.25
59	2	2	1	5.83	5.25	5.5	5.5	4	0	0.86	2.8	4
24	2	1	24	6.42	6	6.5	6.25	6	0.71	0.57	5.2	4.75
21	2	1	1	5.67	6.5	6.25	6.25	5.75	0	0.14	4.4	5.25
22	2	1	2	6.17	6	6.75	3.75	6	2.86	2.14	4.4	3.75
36	2	2	24	5.92	6.25	6.25	5.25	5.75	0.57	1	4.8	4.25
21	2	1	36	3.83	5.75	6.75	6.25	6	1.14	2	4.8	5.75
33	2	2	18	6.5	6.75	6	5.25	5.25	0.29	1	4.2	4
